# Supplementary material for: Circular polarized light-dependent anomalous photovoltaic effect from achiral hybrid perovskites
Source: Springer Nature journal article supplement (doi:10.1038/s41467-022-35441-9), 2022-12-13
Supplement: MOESM1 [file 41467_2022_35441_MOESM1_ESM.pdf]

## **Supplementary information**

### **Circular polarized light-dependent anomalous photovoltaic effect from achiral hybrid perovskites**

*Tingting Zhu et al.*

## Supplementary Figures

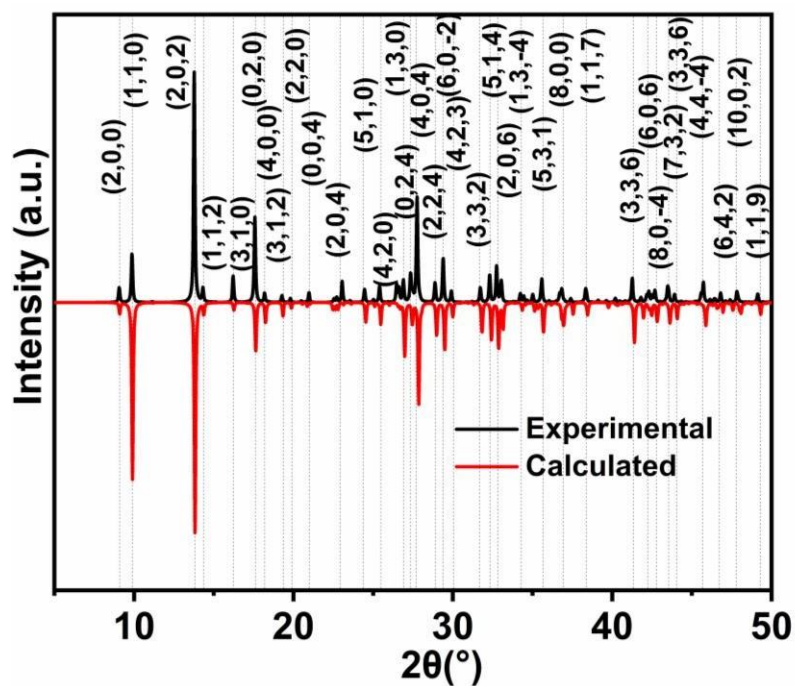

**Supplementary Figure 1.** Experimental and simulated powder X-ray diffraction patterns for **ABI** and labeled diffraction peaks.

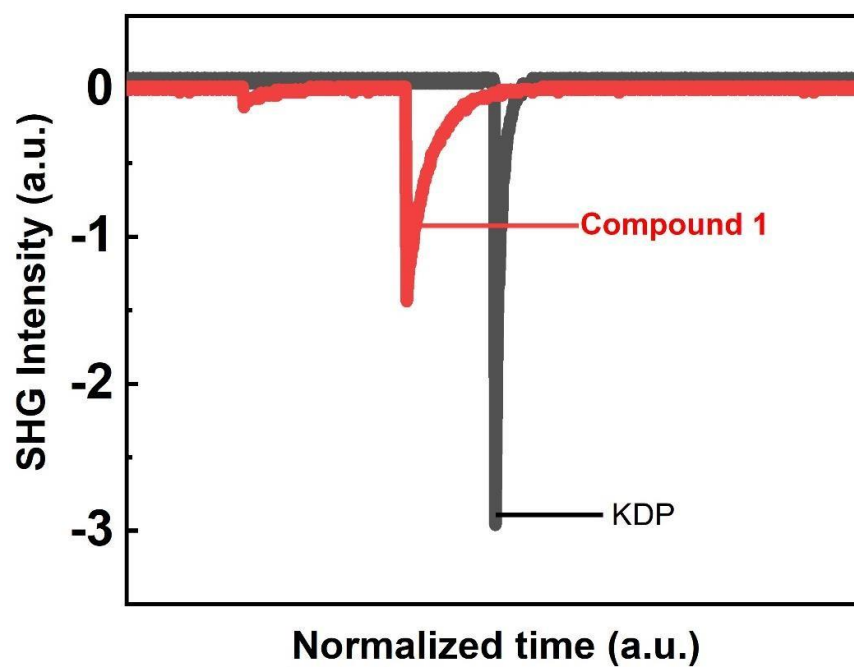

**Supplementary Figure 2.** Oscilloscope traces of SHG signals of **ABI**.

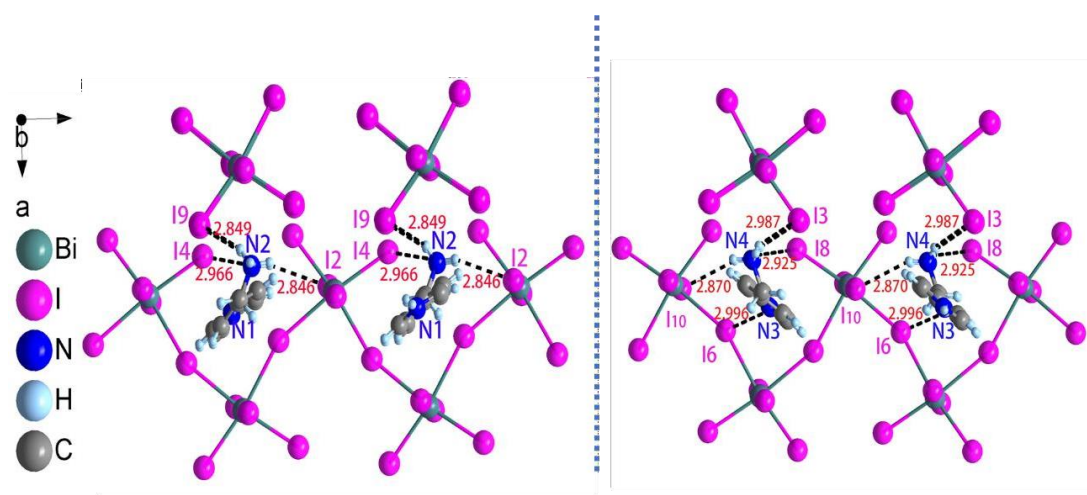

**Supplementary Figure 3.** N-H...I hydrogen bond configurations of **ABI**.

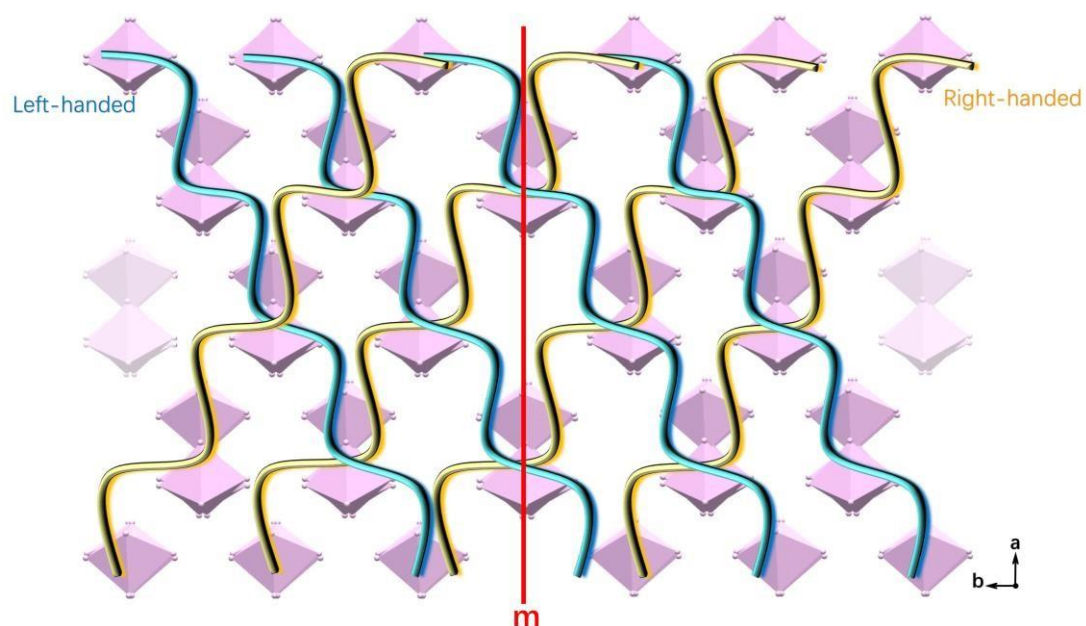

**Supplementary Figure 4.** The packing and arrangement of left-handed and right-handed helix relative to the m symmetry plane in **ABI** crystals.

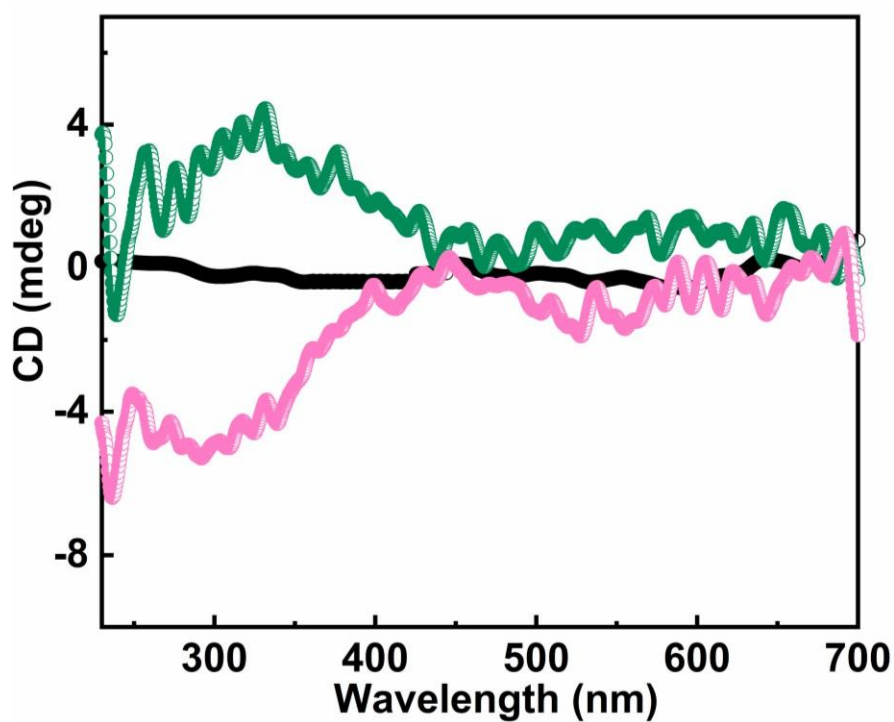

**Supplementary Figure 5.** Solid-state circular dichroism spectra using the mixed **ABI** and KBr powder sample.

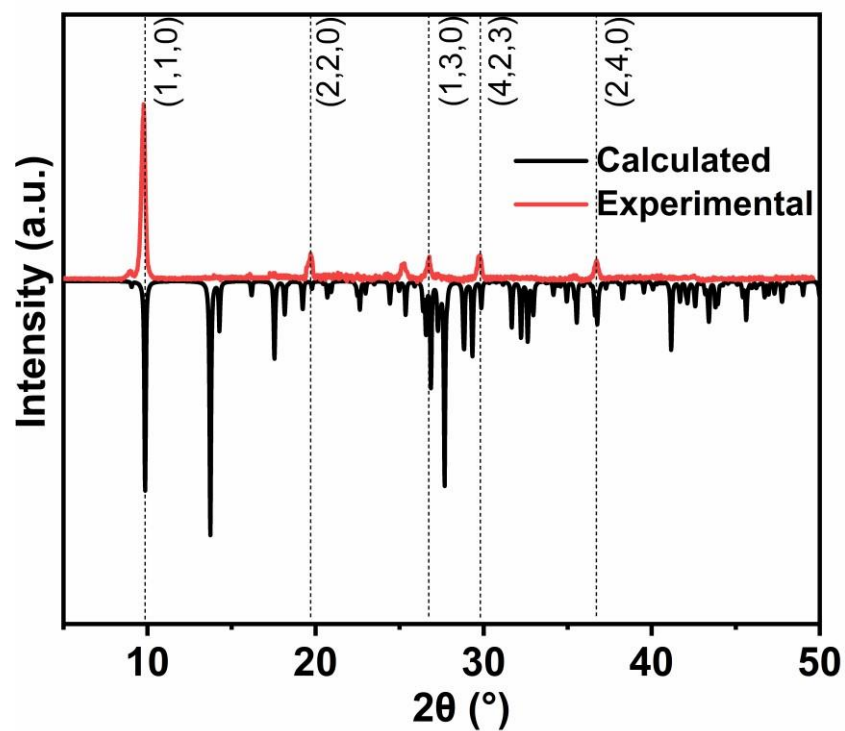

**Supplementary Figure 6.** Experimental and simulated X-ray diffraction patterns of **ABI** films.

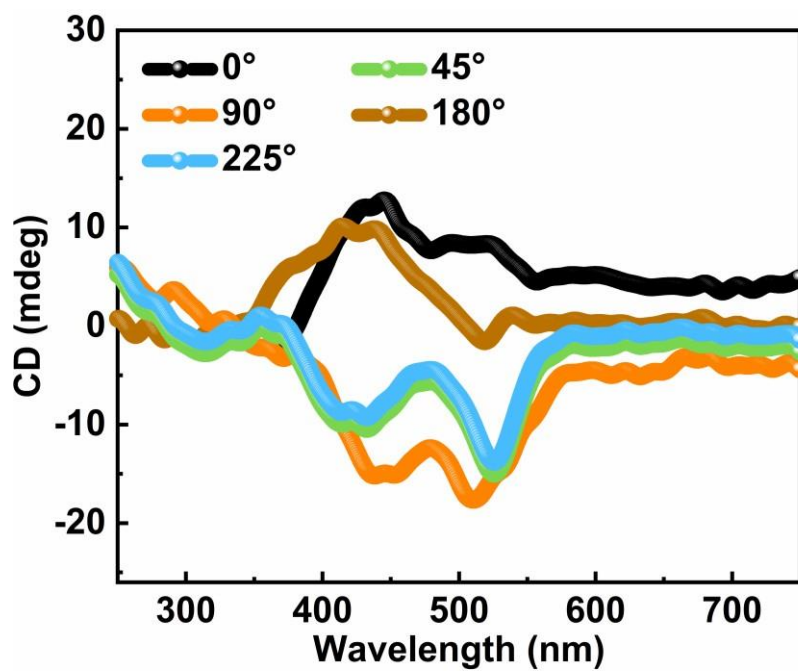

**Supplementary Figure 7.** Circular dichroism spectra of **ABI** films with

different rotation angles.

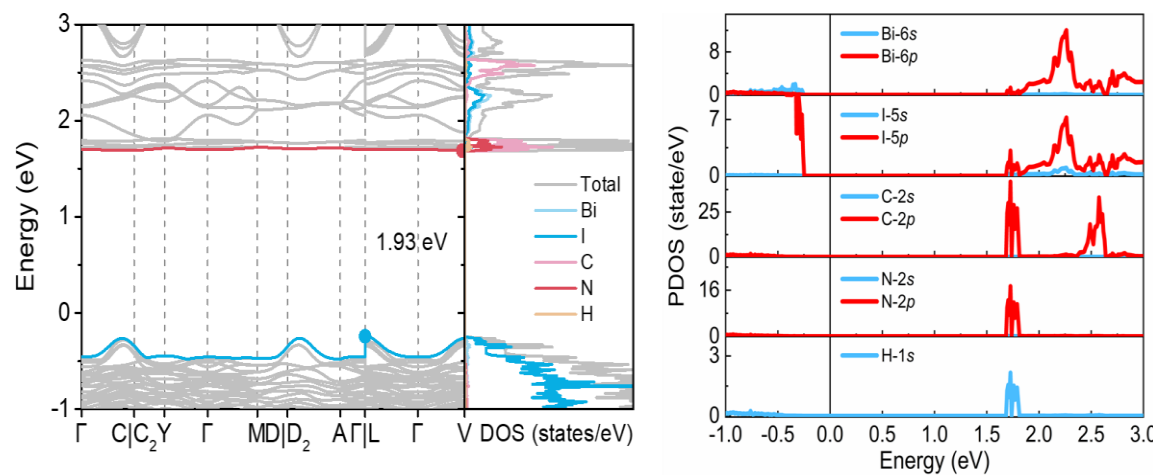

**Supplementary Figure 8.** Calculated band structure and Partial density of states spectra of **ABI** using PBE-D3.

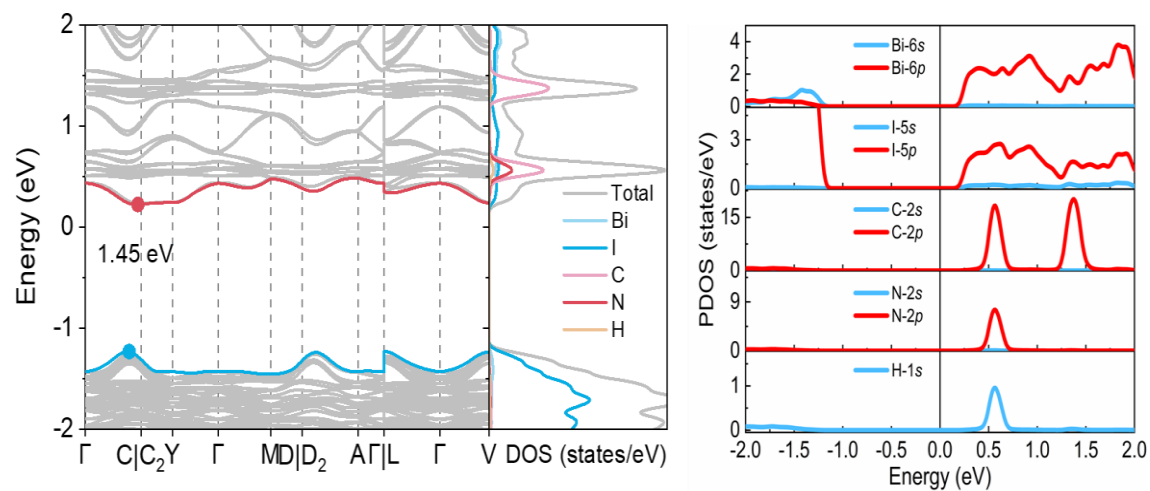

**Supplementary Figure 9.** Calculated band structure and Partial density of states spectra of **ABI** using PBE+SOC.

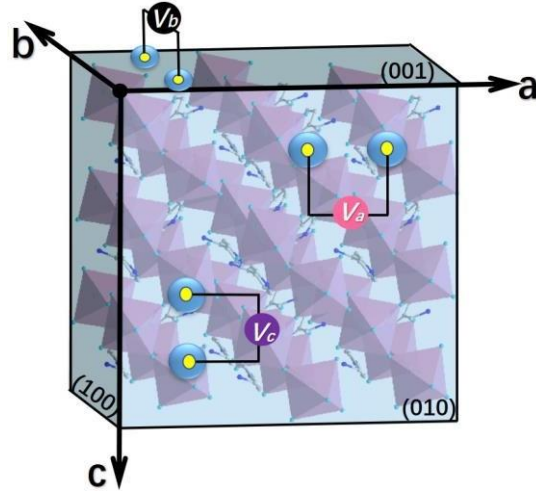

**Supplementary Figure 10.** Schematic diagram for photovoltages measurements.  $V_a$ ,  $V_b$ ,  $V_c$  refers to the photovoltages measured along the directions  $a$ ,  $b$  and  $c$ , respectively.

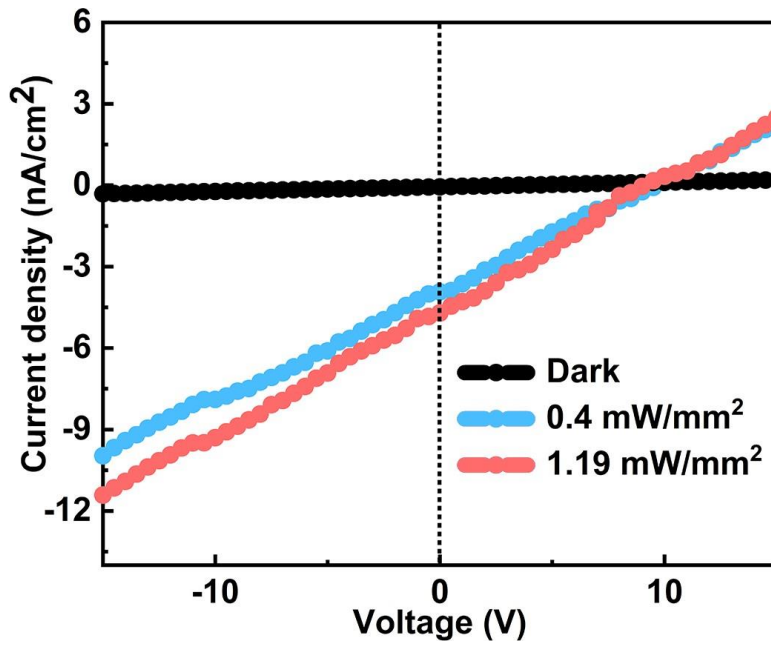

**Supplementary Figure 11.** I–V curves of the ABI measured in the dark and under different illumination intensities at 266 nm.

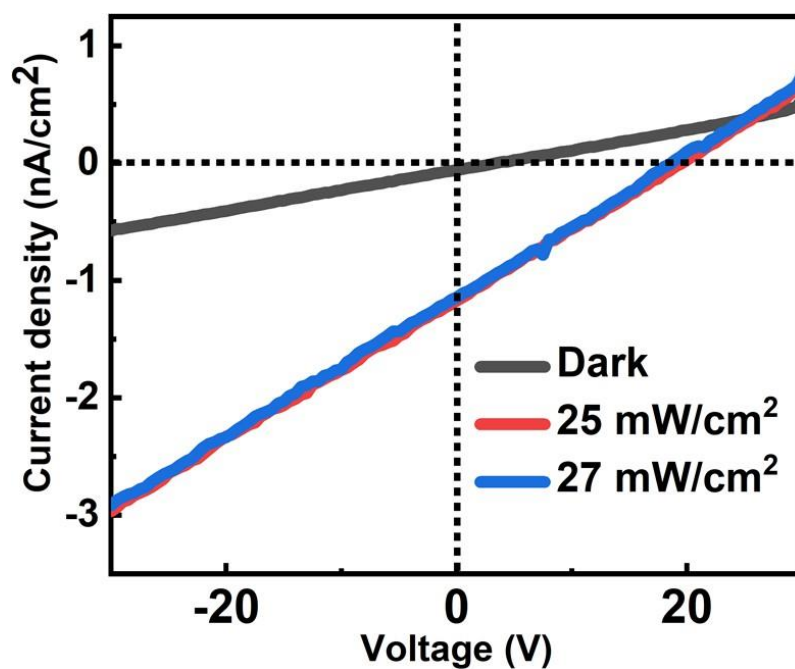

**Supplementary Figure 12.** I–V curves of the **ABI** measured in the dark and under different illumination intensities at 377 nm.

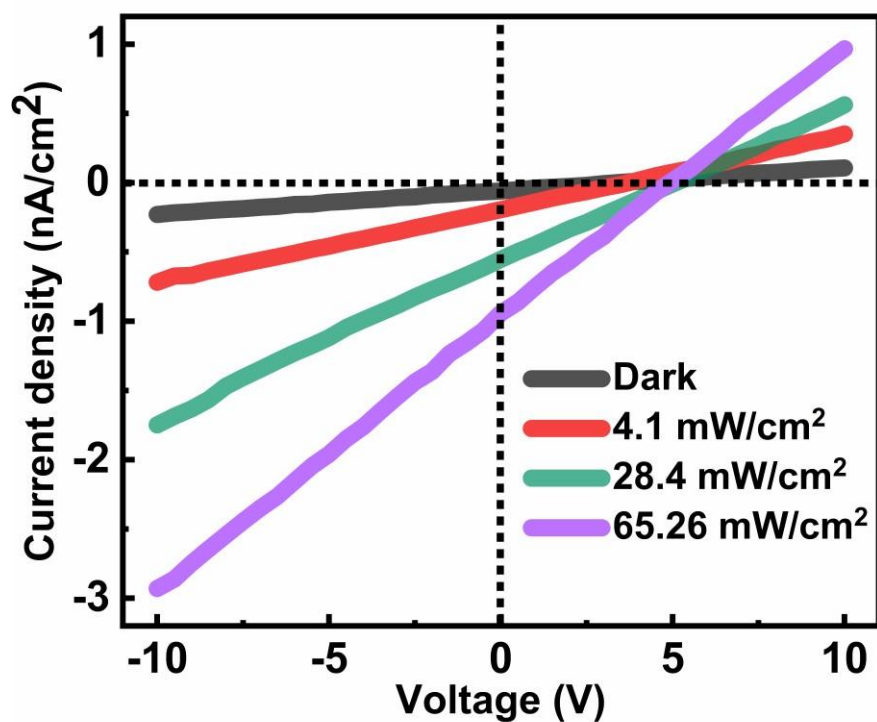

**Supplementary Figure 13.** I–V curves of the **ABI** measured in the dark



and under different illumination intensities at 520 nm.

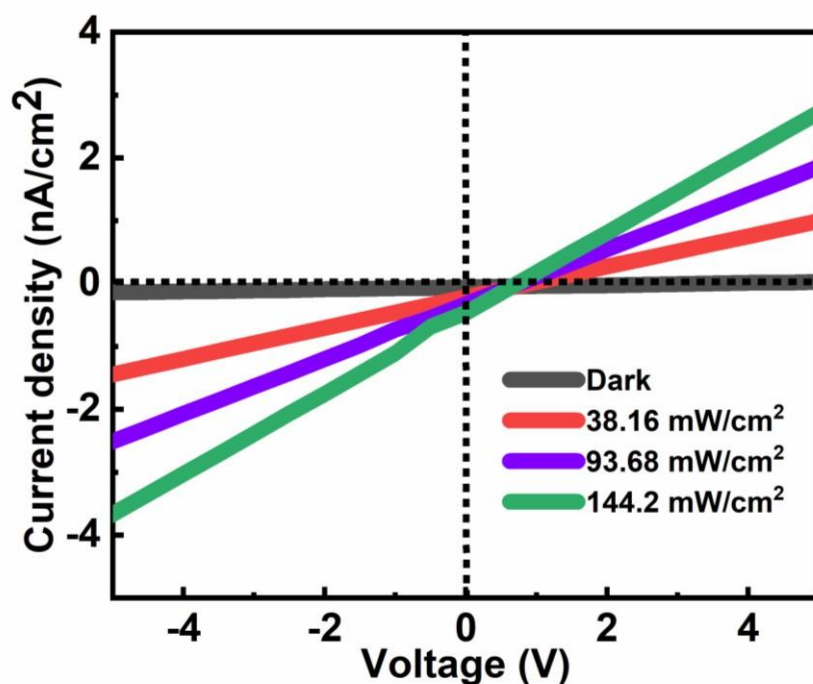

**Supplementary Figure 14.** I–V curves of the **ABI** measured in the dark and under different illumination intensities at 637 nm.

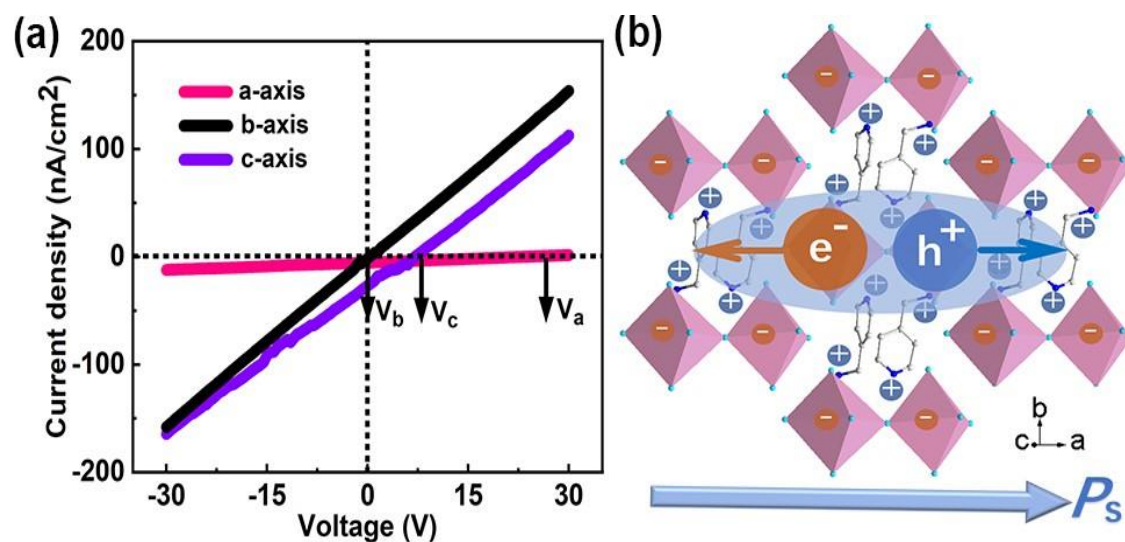

**Supplementary Figure 15.** Photovoltage dependence with polarization direction (a) I–V traces measured along the different axes. (b) Schematic illumination of photoexcited carrier separation under illumination.

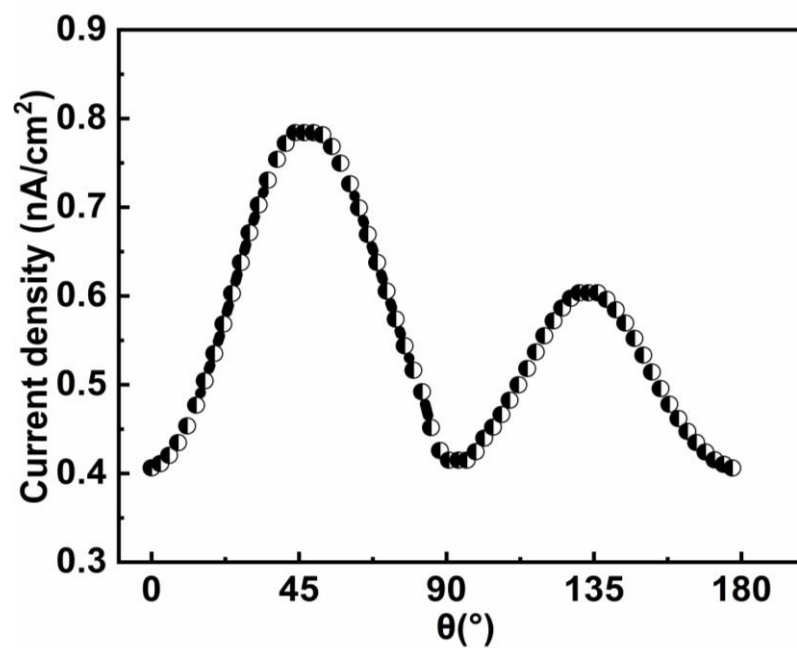

**Supplementary Figure 16.** Photocurrent measured as the function of rotation angle of  $\lambda/4$  plate when the light is incident according the Figure 4a.

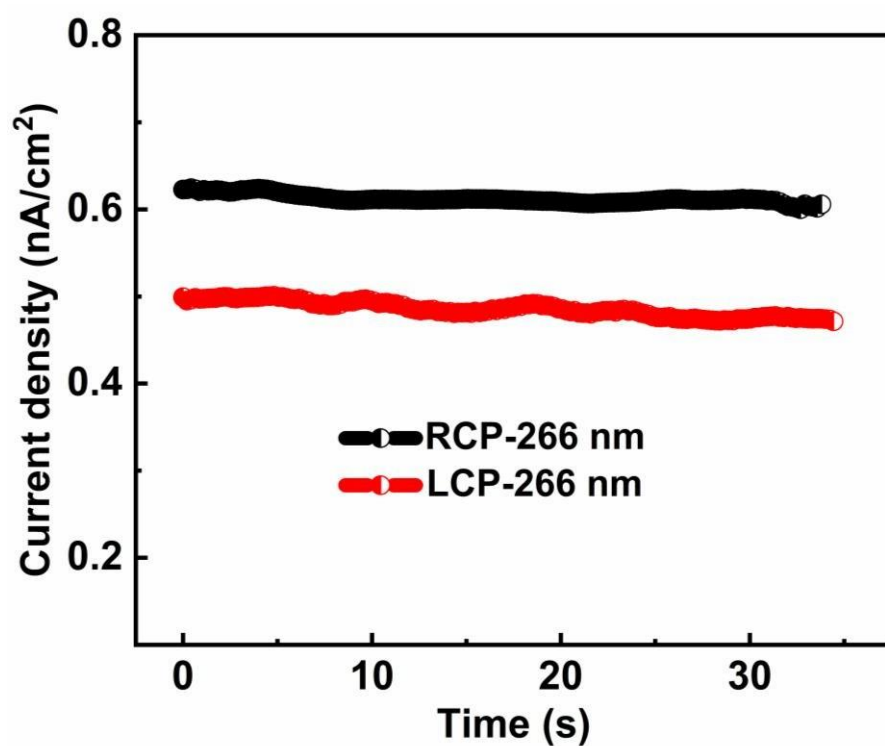

**Supplementary Figure 17.** The photocurrent density as a function of time under LCP-266 and RCP-266 nm irradiation recorded at  $V_{\text{bias}} = 0$  V.

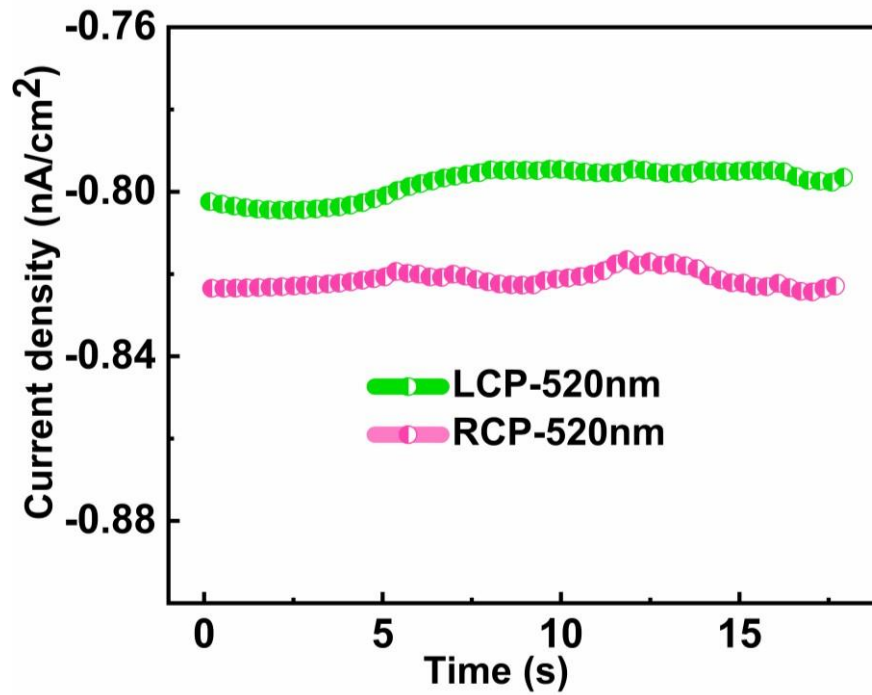

**Supplementary Figure 18.** The photocurrent density as a function of time under LCP-520 and RCP-520 nm irradiation recorded at  $V_{\text{bias}} = 0$  V.

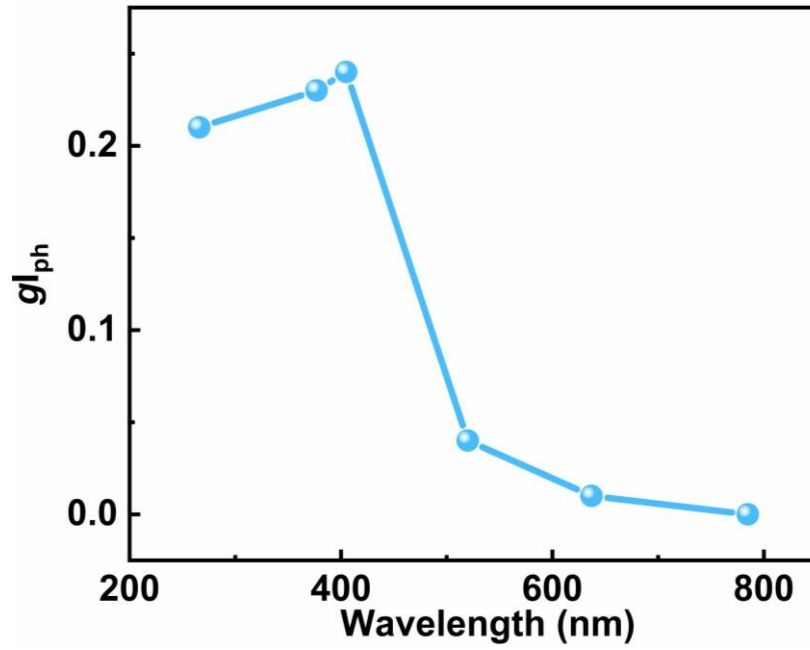

**Supplementary Figure 19.**  $g_{lph}$  as a function of illumination wavelength at the zero bias.

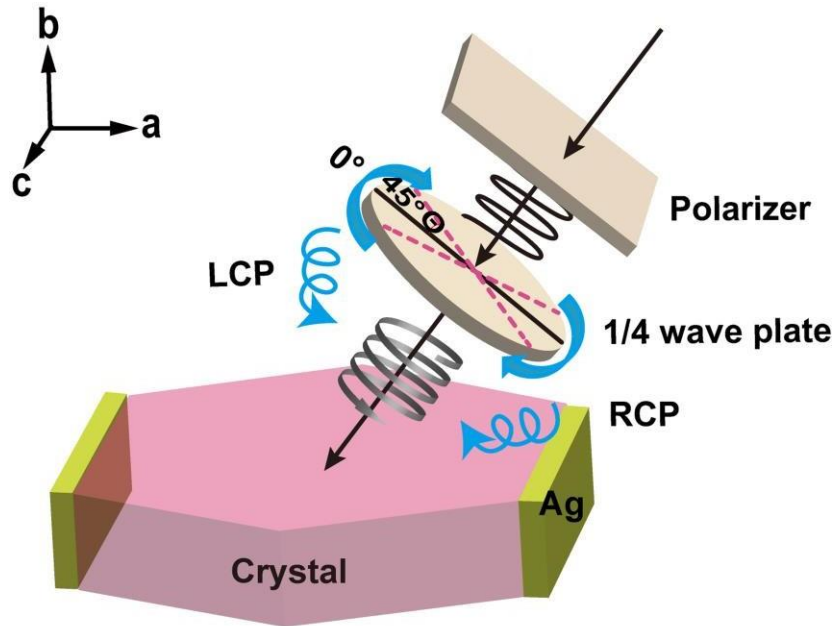

**Supplementary Figure 20.** The schematic view of the testing the CBPE device when the direction of incident light is reversed to that of Figure 4a.

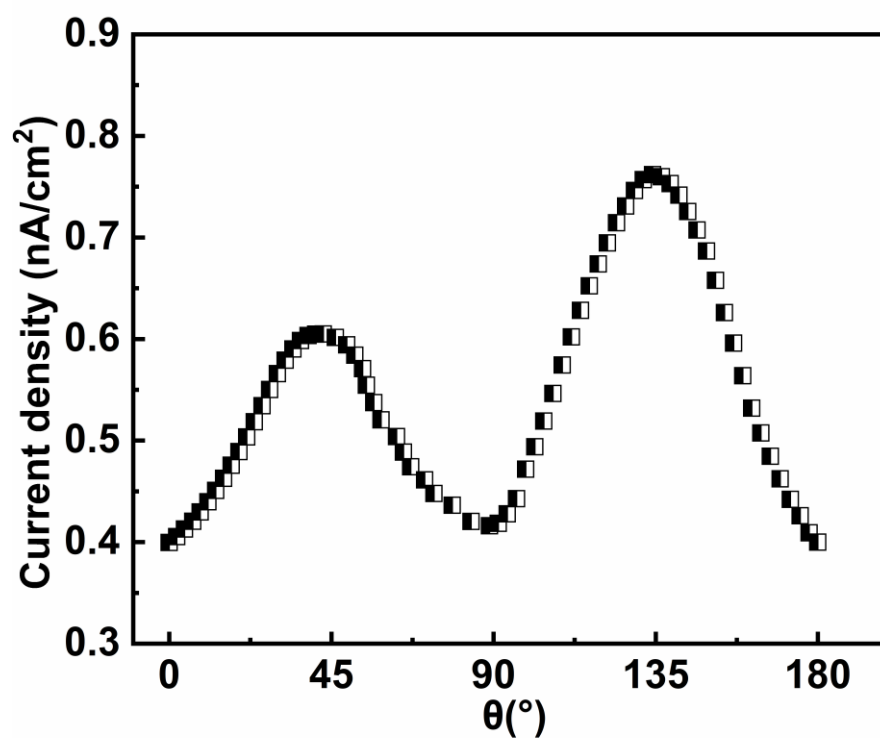

**Supplementary Figure 21.** Photocurrent measured as the function of rotation angle of  $\lambda/4$  plate when the light is incident according to the Supplementary Table 5.

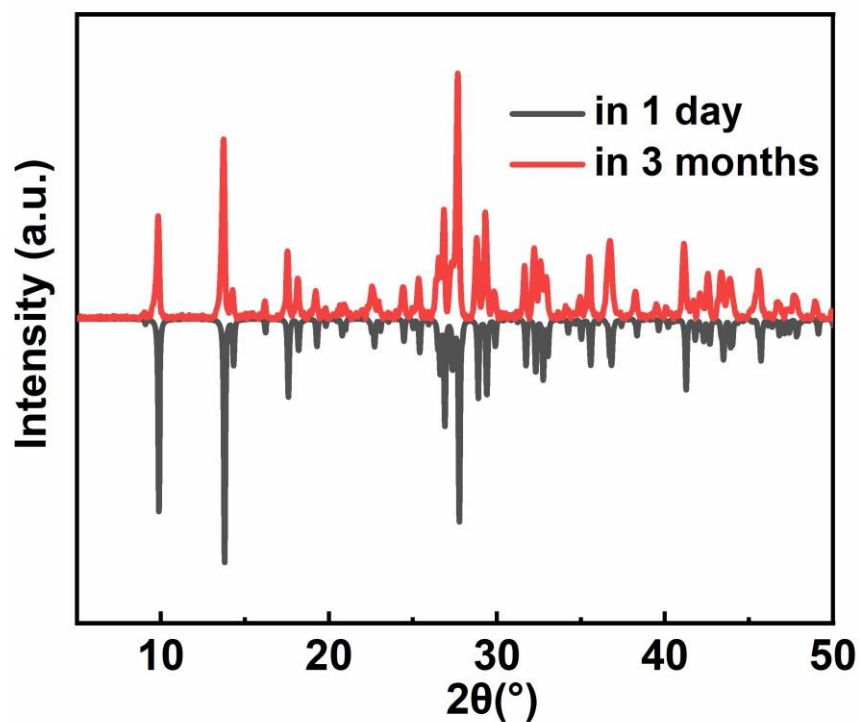

**Supplementary Figure 22.** The ambient stability of **ABI** XRD patterns.

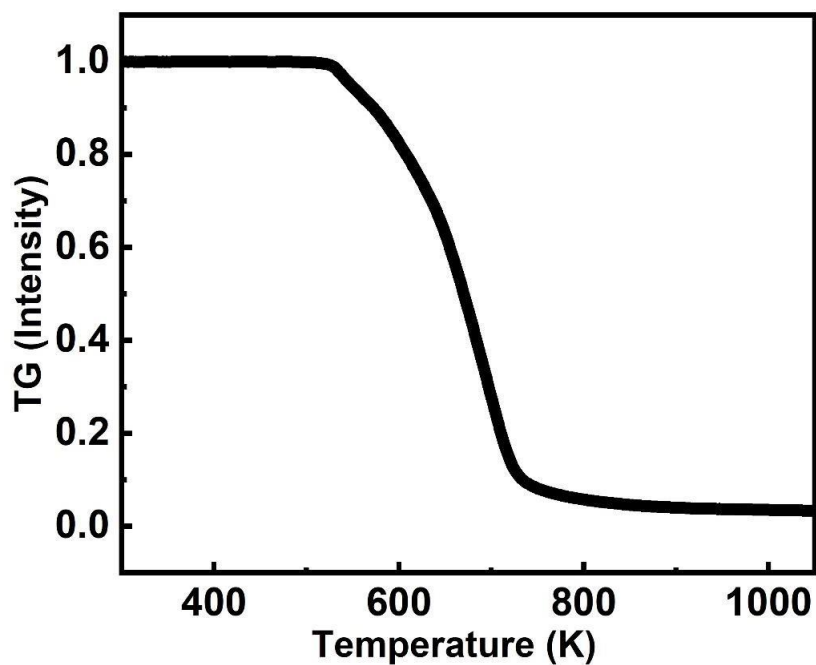

**Supplementary Figure 23.** Thermogravimetric analysis curve for **ABI**.

The result shows that **ABI** has a high thermal stability up to 523 K

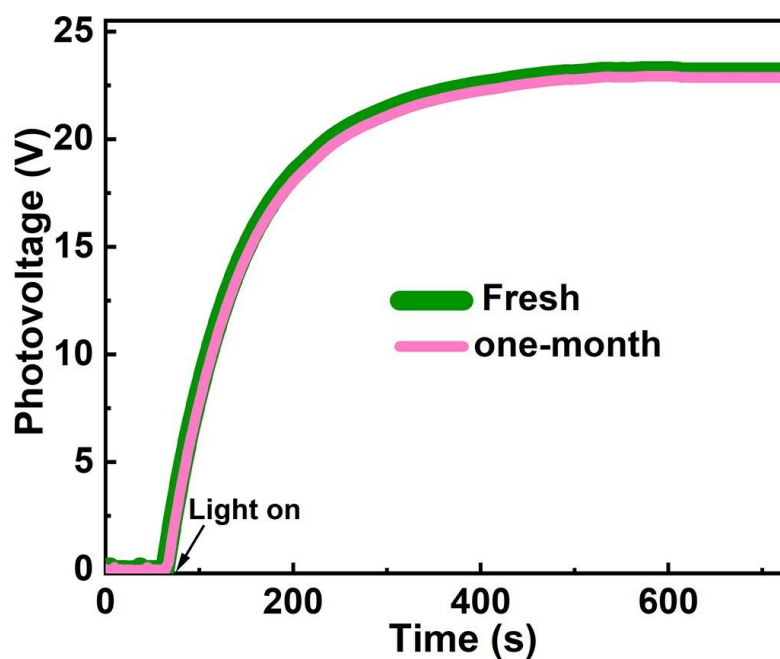

**Supplementary Figure 24.** The photovoltage stability.

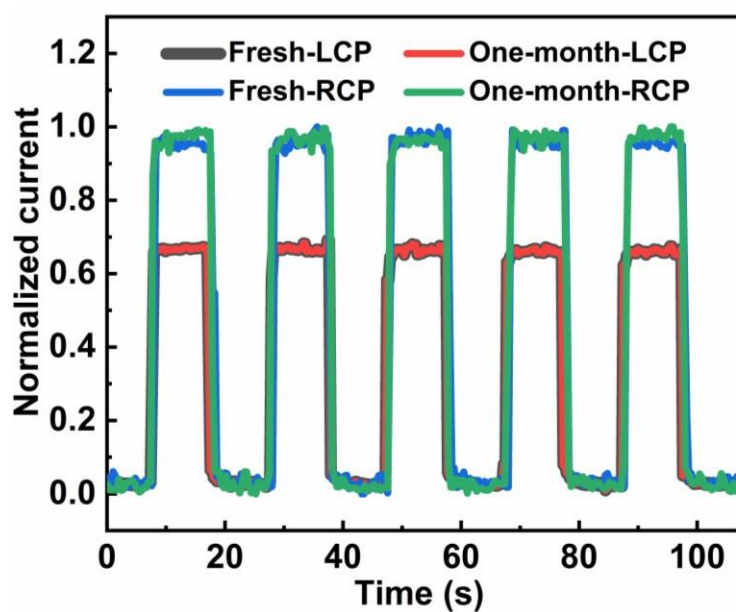

**Supplementary Figure 25.** Photocurrent of fresh and one-month aged **ABI** under LCP and RCP 405 nm light.

**Supplementary Table 1.** Crystal data and structure refinement for

**compound ABI.**

| Name                                    | ABI                                                             |
|-----------------------------------------|-----------------------------------------------------------------|
| Temperature/K                           | 209.15                                                          |
| Empirical formula                       | C <sub>6</sub> H <sub>110</sub> N <sub>2</sub> BiI <sub>5</sub> |
| Crystal system                          | Monoclinic, Cc                                                  |
| Cell parameters                         | $a = 19.492(2) \text{ \AA}$                                     |
|                                         | $b = 10.0829(8) \text{ \AA}$                                    |
|                                         | $c = 17.08113(12) \text{ \AA}$                                  |
| $V (\text{\AA}^3)$                      | 3357.1(5)                                                       |
| $Z, \rho_{\text{cal.}} (\text{g/cm}^3)$ | 8, 3.774                                                        |
| $F(000)$                                | 3264.0                                                          |
| Theta range (°)                         | 4.77-55.004                                                     |
| Limiting indices                        | $-25 \leq h \leq 24,$                                           |
|                                         | $-12 \leq k \leq 13,$                                           |
|                                         | $-22 \leq l \leq 22$                                            |
| Data/restraints/parameter               | 7635/98/256                                                     |
| Completeness                            | 100                                                             |
| GOF                                     | 0.935                                                           |
| Final $R$ indices [ $I > 2\sigma(I)$ ]  | $R_1 = 0.0443,$                                                 |
|                                         | $wR_2 = 0.0770$                                                 |
| $R$ indices (all data)                  | $R_1 = 0.0641,$                                                 |
|                                         | $wR_2 = 0.0868$                                                 |
| Largest diff. peak and hole             | 1.40, -1.22 e. $\text{\AA}^{-3}$                                |

Notes: The explanations of the B-level alerts in the CheckCIF routine of **ABI**: about the angles be 90 for a monoclinic cell. Anomalous photovoltaic effect only exists in the direction parallel to the  $ac$  plane, and is almost negligible in the direction of  $b$ -axis. Further, CBPE effect are detectable in the direction parallel to the  $ac$  plane. This phenomenon is consistent with the theoretical analysis of the chiroptical activity of space group  $Cc$ . Above experimental results can support the correctness of structural crystallization in  $Cc$  space group.



**Supplementary Table 2.** Selected Bi-I bond lengths for **ABI**

| <b>ABI-1</b>            | <b>Bond lengths</b> |
|-------------------------|---------------------|
| Bi(1)-I(1)              | 3.235(5)            |
| Bi(1)-I(2)              | 3.162 (3)           |
| Bi(1)-I(3)              | 2.938 (5)           |
| Bi(1)-I(4)              | 2.965 (5)           |
| Bi(1)-I(5)              | 2.979 (3)           |
| Bi(1)-I(6)              | 3.251 (5)           |
| Bi(2)-I(1)              | 3.252(5)            |
| Bi(2)-I(6) <sup>1</sup> | 3.235 (5)           |
| Bi(2)-I(7)              | 3.040 (4)           |
| Bi(2)-I(8)              | 2.959 (5)           |
| Bi(2)-I(9)              | 2.948 (5)           |
| Bi(2)-I(10)             | 3.079 (4)           |

**Supplementary Table 3.** Selected I-Bi-I bond angles for **ABI**

| <b>ABI-1</b>                   | <b>Bond angles</b> |
|--------------------------------|--------------------|
| I (1I)-Bi(1)-I(6)              | 84.59 (17)         |
| I (2)-Bi(1)-I(1)               | 85.42 (10)         |
| I (2)-Bi(1)-I(6)               | 91.17 (10)         |
| I (3)-Bi(1)-I(1)               | 87.81(12)          |
| I (3)-Bi(1)-I(2)               | 87.58(11)          |
| I (3)-Bi(1)-I(4)               | 98.15(15)          |
| I (3)-Bi(1)-I(5)               | 91.13 (12)         |
| I (3)-Bi(1)-I(6)               | 172.37(16)         |
| I (4)-Bi(1)-I(1)               | 170.83 (11)        |
| I (4)-Bi(1)-I(2)               | 87.87(10)          |
| I (4)-Bi(1)-I(5)               | 95.21 (10)         |
| I (4)-Bi(1)-I(6)               | 89.31 (12)         |
| I (5)-Bi(1)-I(1)               | 91.61 (11)         |
| I (5)-Bi(1)-I(2)               | 176.80 (15)        |
| I (5)-Bi(1)-I(6)               | 89.73 (11)         |
| I (6) <sup>1</sup> -Bi(2)-I(1) | 84.25(17)          |
| I (7)-Bi(2)-I(1)               | 91.28 (11)         |
| I (7)-Bi(2)-I(6) <sup>1</sup>  | 90.99(11)          |
| I (7)-Bi(2)-I(10)              | 177.08(15)         |
| I (8)-Bi(2)-I(1)               | 89.92(12)          |
| I (8)-Bi(2)-I(6) <sup>1</sup>  | 174.02(16)         |
| I (8)-Bi(2)-I(7)               | 90.47(12)          |
| I (8)-Bi(2)-I(10)              | 92.25(12)          |
| I (9)-Bi(2)-I(1)               | 174.64(16)         |
| I (9)-Bi(2)-I(6) <sup>1</sup>  | 87.51 (12)         |
| I (9)-Bi(2)-I(7)               | 87.47 (11)         |
| I (9)-Bi(2)-I(8)               | 98.35 (16)         |
| I (9)-Bi(2)-I(10)              | 91.06 (11)         |
| I (10)-Bi(2)-I(1)              | 89.81 (11)         |
| I (10)-Bi(2)-I(1)              | 89.81 (11)         |

**Supplementary Table 4.** The asymmetry factor of various reported CPL

detectors:

| <b>compound</b>                    | <b>asymmetry factor</b> | <b>Ref.</b> |
|------------------------------------|-------------------------|-------------|
| ( <i>R</i> -α-PEA)PbI <sub>3</sub> | 0.1                     | [1]         |

|                                                                                     |      |                  |
|-------------------------------------------------------------------------------------|------|------------------|
| $[(R)-\beta\text{-MPA}]_2\text{MAPb}_2\text{I}_7$                                   | 0.2  | [2]              |
| $(R-\alpha\text{-PEA})_2\text{PbI}_4$                                               | 0.23 | [3]              |
| $[(R)-\beta\text{-MPA}]_4\text{AgBiI}_8$                                            | 0.3  | [4]              |
| $(R\text{-BPEA})_2\text{PbI}_4$                                                     | 0.1  | [5]              |
| $(R\text{ (or S)-NEA})\text{PbI}_3$                                                 | 1.73 | [6]              |
| $[(R)-\beta\text{-MPA}]_2\text{PbCl}_4$                                             | 0.1  | [7]              |
| $(R,R)\text{-}$ and $(S,S)\text{-}$ ProSQ - C6<br>Fullerene-blended BHJ photodiodes | 0.1  | [8]              |
| <b>ABI</b>                                                                          | 0.24 | <i>This work</i> |

Calculation of polarization of **ABI** according to a point charge model

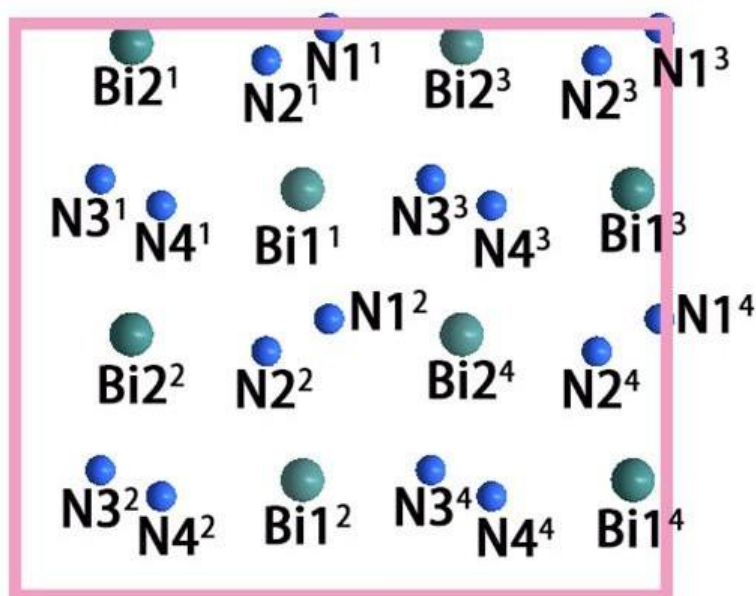

**Supplementary Figure 26.** Distribution of Bi and I atoms of **ABI** in a unit cell.

Based on the crystal structure data of **ABI**, we select a unit cell and assume that the centers of the positive charges of the  $(4\text{AMP})^{2+}$  and the

negative charges of the  $(\text{BiI}_5)^{2-}$  are located on the N atoms and Bi atoms, respectively

**Supplementary Table 5.**

| Atoms | Atoms coordinate                       |                                        | Coordinate of charge center |
|-------|----------------------------------------|----------------------------------------|-----------------------------|
| Bi1   | $\text{Bi1}^1(0.4419, 0.5083, 0.2949)$ | $\text{Bi1}^2(0.4419, 0.4917, 0.7949)$ | $(0.77523, 0.5, 0.5449)$    |
|       | $\text{Bi1}^3(0.9419, 0.4917, 0.7949)$ | $\text{Bi1}^4(0.9419, 0.5083, 0.2949)$ |                             |
| Bi2   | $\text{Bi2}^1(0.1829, 0.4967, 0.0447)$ | $\text{Bi2}^2(0.1829, 0.5033, 0.5447)$ | $(0.34957, 0.5, 0.2947)$    |
|       | $\text{Bi2}^3(0.6829, 0.4967, 0.0447)$ | $\text{Bi2}^4(0.6829, 0.5033, 0.5447)$ |                             |
| N1    | $\text{N1}^1(0.482, 0.781, 0.018)$     | $\text{N1}^2(0.482, 0.219, 0.518)$     | $(0.732, 0.5, 0.268)$       |
|       | $\text{N1}^3(0.982, 0.281, 0.018)$     | $\text{N1}^4(0.982, 0.719, 0.518)$     |                             |
| N2    | $\text{N2}^1(0.387, 0.233, 0.074)$     | $\text{N2}^2(0.387, 0.767, 0.574)$     | $(0.637, 0.5, 0.324)$       |
|       | $\text{N2}^3(0.887, 0.733, 0.074)$     | $\text{N2}^4(0.887, 0.267, 0.574)$     |                             |
| N3    | $\text{N3}^1(0.136, 0.717, 0.278)$     | $\text{N3}^2(0.136, 0.283, 0.778)$     | $(0.386, 0.5, 0.528)$       |
|       | $\text{N3}^3(0.636, 0.217, 0.278)$     | $\text{N3}^4(0.636, 0.783, 0.778)$     |                             |
| N4    | $\text{N4}^1(0.228, 0.264, 0.323)$     | $\text{N4}^2(0.228, 0.736, 0.823)$     | $(0.478, 0.5, 0.573)$       |
|       | $\text{N4}^3(0.728, 0.764, 0.323)$     | $\text{N4}^4(0.728, 0.236, 0.823)$     |                             |

The electric polarization (Ps) along a-axis can be estimated to be:

$$\begin{aligned} \text{Ps} &= \{[-8e \times (0.77523+0.34957)] + (0.732+0.637+0.386+0.478) \times 4e\} \times a / V \\ &= -0.0664 \times 1.6 \times 10^{-19} \times 19.523 \times 10^{-10} \text{ C m} / 3379.51 \times 10^{-30} \text{ m}^3 \\ &= -6.137 \times 10^{-3} \text{ C m}^{-2} \end{aligned}$$

$$|\text{Ps}| = 6.137 \times 10^{-3} \text{ C m}^{-2} = 0.6137 \mu\text{C cm}^{-2}$$

Thus, electric dipole moments  $\mu = \text{Ps} \times V$

$$= 2.074 \times 10^{-29} \text{ C} \cdot \text{m} = 6.22 \text{ ID}$$

The electric polarization (Ps) along c-axis can be estimated to be:

$$\begin{aligned} \text{Ps} &= \{-8e \times (0.5449+0.2947) + (0.268+0.324+0.528+0.573) \times 4e\} \times c / V \\ &= -0.0552 \times 1.6 \times 10^{-19} \times 17.1453 \times 10^{-10} \text{ C m} / 3379.51 \times 10^{-30} \text{ m}^3 \\ &= -0.00448 \text{ C m}^{-2} \end{aligned}$$

$$|\text{Ps}| = 0.00448 \text{ C m}^{-2} = 0.448 \mu\text{C cm}^{-2}$$

Thus, electric dipole moments  $\mu = \text{Ps} \times V$

$$= 1.514 \times 10^{-29} \text{ C} \cdot \text{m} = 4.54 \text{ D}$$

### Supplementary References:

- (1) Chen, C. *et al.* Circularly Polarized Light Detection Using Chiral Hybrid Perovskite. *Nat. Commun.* **10**, 1–7 (2019).
- (2) Wang, L. *et al.* A Chiral Reduced-Dimension Perovskite for an Efficient Flexible Circularly Polarized Light Photodetector. *Angew. Chem. Int. Ed.* **59**, 6442–6450 (2020).
- (3) Wang, J. *et al.* Spin-Dependent Photovoltaic and Photogalvanic Responses of Optoelectronic Devices Based on Chiral Two-Dimensional Hybrid Organic-Inorganic Perovskites. *ACS Nano*. **15**, 588–595 (2021).

- (4) Li, D. *et al.* Chiral Lead-Free Hybrid Perovskites for Self-Powered Circularly Polarized Light Detection. *Angew. Chem. Int. Ed.* **60**, 8415–8418 (2021).
- (5) Peng, Y. *et al.* Realization of Vis–NIR Dual-Modal Circularly Polarized Light Detection in Chiral Perovskite Bulk Crystals. *J. Am. Chem. Soc.* **143**, 14077–14082 (2021).
- (6) Ishii, A. & Miyasaka, T. Direct Detection of Circular Polarized Light in Helical 1D Perovskite-Based Photodiode. *Sci. Adv.* **6**, 1–7 (2020).
- (7) Zhang, X. *et al.* Heterogeneous Integration of Chiral Lead–Chloride Perovskite Crystals with Si Wafer for Boosted Circularly Polarized Light Detection in Solar-Blind Ultraviolet Region. *Small*, **17**, 2102884 (2021).
- (8) Schulz, M. *et al.* Chiral Excitonic Organic Photodiodes for Direct Detection of Circular Polarized Light. *Adv. Funct. Mater.* **29**, 1900684 (2019).
